# Supplementary material for: A Simple, Efficient, Eco-Friendly Sample Preparation Procedure for the Simultaneous Determination of Hormones in Meat and Fish Products by Gas Chromatography—Mass Spectrometry
Source: MDPI journal article supplement (doi:10.3390/foods11193095), 2022-10-05
Supplement: s1 [file s1]

## **Supplementary Material**

**A simple, efficient, eco-friendly sample preparation procedure for the simultaneous determination of hormones in meat and fish products by gas chromatography–mass spectrometry**

Safae Chafi, Evaristo Ballesteros

Department of Physical and Analytical Chemistry, E.P.S of Linares, University of Jaén,  
23700 Linares, Jaén, Spain

**Table S1.** Comparison of the proposed and alternative methods for determining natural and synthetic hormones in meat and fish products from around the world.<sup>a</sup>

| Analytes                                                                                                                                                                                                                                                                                                                                                                                                                                           | Samples                                                      | Countries   | Pretreatment methods                                                  | Analytical techniques              | Analytical features                                                 | Concentration in real samples                                                                                                            | Reference |
|----------------------------------------------------------------------------------------------------------------------------------------------------------------------------------------------------------------------------------------------------------------------------------------------------------------------------------------------------------------------------------------------------------------------------------------------------|--------------------------------------------------------------|-------------|-----------------------------------------------------------------------|------------------------------------|---------------------------------------------------------------------|------------------------------------------------------------------------------------------------------------------------------------------|-----------|
| 4-Androstene-3,17-dione, stanozolol, 17 $\alpha$ -hydroxyprogesterone, prednisone, prednisolone, testosterone, hydrocortisone, megestrol acetate, medroxyprogesterone acetate, and progesterone                                                                                                                                                                                                                                                    | Chicken, pork, beef and sausages                             | China       | MSPD                                                                  | UPLC–MS/MS                         | LOD: 0.01–0.05 $\mu$ g/kg<br>RSD: < 10%<br>Recovery: 77–99%         | Hydrocortisone: 2.4–3.4 $\mu$ g/kg<br>Progesterone: 2.1 $\mu$ g/kg                                                                       | [1]       |
| 17 $\beta$ -Estradiol, 17 $\alpha$ -ethinyl estradiol, diethylstilbestrol and others EDCs                                                                                                                                                                                                                                                                                                                                                          | Fish liver, brain and muscle                                 | Spain       | FUSLE, MSPD                                                           | LC–MS/MS                           | LOD: 3–20 $\mu$ g/kg<br>RSD: < 26%<br>Recovery: 62–132%             | Diethylstilbestrol: 7–8 $\mu$ g/kg                                                                                                       | [5]       |
| Estrone, 17 $\alpha$ -ethinyl estradiol, diethylstilbestrol and others EDCs                                                                                                                                                                                                                                                                                                                                                                        | Fish muscle, liver, gill and gonad                           | China       | QuEChERS, derivatization (BSTFA–1% TMCS)                              | GC–MS                              | LOD : 0.03–1.95 $\mu$ g/kg<br>RSD: 0.95–11.9 %<br>Recovery: 47–128% | Estrone: 7.0–308 $\mu$ g/kg<br>17 $\alpha$ -Ethinylestradiol: 5.4–27.3 $\mu$ g/kg<br>Diethylstilbestrol: 4.79–15.6 $\mu$ g/kg            | [6]       |
| Dienestrol, diethylstilbestrol, hexestrol, progesterone, 17 $\alpha$ -methyl testosterone, epitestosterone, 6 propyl-2-thiouracile, testosterone, melengestrol acetate, $\beta$ -estradiol-3-benzoate, 17 $\beta$ -estradiol, 17 $\alpha$ -ethinyl estradiol and estriol                                                                                                                                                                           | Bovine matrices: muscle, kidney, liver and bile              | Lebanon     | QuEChERS                                                              | LC–MS/MS                           | LOD: 0.13–0.86 $\mu$ g/kg<br>RSD: < 23 %<br>Recovery: 52–107%       | Progesterone: 0.11–11.7 $\mu$ g/kg<br>Testosterone: 0.5–9.5 $\mu$ g/kg<br>Epi-testosterone: 0.89–280 $\mu$ g/kg                          | [10]      |
| Diethylstilbestrol, estrone, 17 $\beta$ -estradiol, 17 $\alpha$ -ethinylestradiol, estriol, levonorgestrel, norethisterone, megestrol acetate, progesterone, testosterone, boldenone, nandrolone, cortisone, prednisone and prednisolone                                                                                                                                                                                                           | Fish: <i>Sphoeroides marmoratus</i> and <i>Boops boops</i> ) | Spain       | MAE, SPE                                                              | UHPLC–MS/MS                        | LOD: 0.14–49 $\mu$ g/kg<br>RSD: < 20%<br>Recovery: 20–130%          | Norethisterone: 500–2710 $\mu$ g/kg<br>Prednisolone: 90 $\mu$ g/kg<br>Nandrolone: 70–520 $\mu$ g/kg<br>Progesterone: 560–3950 $\mu$ g/kg | [11]      |
| Progesterone, norethindrone, medroxyprogesterone, levonorgestrel, testosterone, 19-nortestosterone, methyltestosterone , stanozolol, androstenedione, dihydrotestosterone, estrone, 17 $\beta$ -estradiol, 17 $\alpha$ -ethinyl estradiol, dienestrol, hexestrol, diethylstilbestrol and others EDCs                                                                                                                                               | Grass and silver carp, white bream and catfish               | China       | AALLME, QuEChERS                                                      | HPLC–MS/MS                         | LOD: 0.03–0.8 $\mu$ g/kg<br>RSD: 1.1–14.5 %<br>Recovery: 78–119%    | Diethylstilbestrol: 2.2–3.6 $\mu$ g/kg                                                                                                   | [13]      |
| Estradiol, testosterone, progesterone, zeranol and diethylstilbestrol                                                                                                                                                                                                                                                                                                                                                                              | Beef                                                         | South Korea | LLE, SPE, UAE, derivatization (MSTFA/ NH <sub>4</sub> I/DTE)          | GC–MS                              | LOD: 0.1–0.4 $\mu$ g/kg<br>RSD: 5–16%<br>Recovery: 68–106%          | Progesterone: 0.3–36.5 $\mu$ g/kg<br>Testosterone: 0.2 $\mu$ g/kg                                                                        | [19]      |
| Testosterone, androstenedione, 17 $\beta$ -estradiol, estrone, pregnenolone, progesterone, dihydroandrostenedione, and dihydrotestosterone                                                                                                                                                                                                                                                                                                         | Aquatic mollusks                                             | France      | MAE, SPE<br>Derivatization (MSTFA/mercaptoethanol/ NH <sub>4</sub> I) | GC–MS                              | LOD: 0.1–0.4 $\mu$ g/kg<br>RSD: < 16%<br>Recovery: 85–114%          | Progesterone/pregnenolone: <0.4–8.9 $\mu$ g/kg                                                                                           | [20]      |
| Estrone, 17 $\beta$ -estradiol, estriol and anti-inflammatories.                                                                                                                                                                                                                                                                                                                                                                                   | Mussels: <i>Mytilus edulis trossulus</i>                     | Poland      | ASE, SPE, derivatization (BSTFA–1% TMCS)                              | GC–MS                              | LOD: 1–7 $\mu$ g/kg<br>RSD: 0.24–7.8%<br>Recovery: 80–118%          | Estrone: 256 $\mu$ g/kg                                                                                                                  | [22]      |
| 17 $\beta$ -Nortestosterone, fluoxymesterone, progesterone, estrone, estriol, 17 $\alpha$ -estradiol, 17 $\beta$ -estradiol, 17 $\alpha$ -hydroxyprogesterone, 17 $\alpha$ -ethinyl estradiol, diethylstilbestrol, dienestrol, $\alpha$ -zearalanol, $\beta$ -zearalanol, 17 $\alpha$ -testosterone, 17 $\beta$ -testosterone, hexoestrol, norgestrel, acetoxyprogesterone, medroxyprogesterone acetate and methyltestosterone and others hormones | Bovine muscle tissue                                         | Belgium     | LLE, SPE                                                              | UHPLC–Orbitrap–HRMS<br>UHPLC–MS/MS | LOD: 0.04–2.50 $\mu$ g/kg<br>RSD: < 20%<br>Recovery: 81–119%        | –                                                                                                                                        | [24]      |
| Hydrocortisone, cortisone, progesterone, prednisone, prednisolone, testosterone, melengesterol acetate, hydrocortisone-21-acetate, cortisone-21-acetate, testosteronepropionate, 17 $\alpha$ -methyltestosterone, 6 $\alpha$ -methylprednisolone, 17 $\alpha$ -hydroxyprogesterone and medroxyprogesterone                                                                                                                                         | Meat (chicken, pork and beef)                                | Spain       | QuEChERS                                                              | UHPLC–Orbitrap–HRMS                | LOQ: 1–2 $\mu$ g/kg<br>RSD: 1–20 %<br>Recovery: 70–103%             | Hydrocortisone: 2.8 $\mu$ g/kg<br>Progesterone, 1.7 $\mu$ g/kg                                                                           | [25]      |

|                                                                                                                                                                                                                                              |                                                                       |                                                               |                                                                  |             |                                                                      |                                                                                                                                                                                                                                                                                                                                                                           |           |
|----------------------------------------------------------------------------------------------------------------------------------------------------------------------------------------------------------------------------------------------|-----------------------------------------------------------------------|---------------------------------------------------------------|------------------------------------------------------------------|-------------|----------------------------------------------------------------------|---------------------------------------------------------------------------------------------------------------------------------------------------------------------------------------------------------------------------------------------------------------------------------------------------------------------------------------------------------------------------|-----------|
| Hydrocortisone, testosterone, dehydroepiandrosterone, epitestosterone, etiocholanolone, androsterone, progesterone, testosterone propionate, pregnanediol, pregnanetriol, estriol, 17 $\beta$ -estradiol, 17 $\alpha$ -estradiol and estrone | Beef                                                                  | China                                                         | UAE, SPE                                                         | HPLC–MS/MS  | LOQ: 0.004–0.24 $\mu$ g/kg<br>RSD: 2.2–10.2 %<br>Recovery: 66–115%   | Hydrocortisone: 0.22–0.46 $\mu$ g/kg<br>Progesterone: 0.22–1.00 $\mu$ g/kg<br>17 $\beta$ -Estradiol : 0.26–2.51 $\mu$ g/kg<br>Etiocholanolone: 1.21–2.01 $\mu$ g/kg                                                                                                                                                                                                       | [26]      |
| Testosterone, progesterone, pregnenolone, cortisone, hydrocortisone, androsterone, trenbolone acetate and melengestrol acetate                                                                                                               | Beef                                                                  | Italy, Poland, Netherlands, France                            | LLE, SPE, derivatization (NH <sub>2</sub> OCH <sub>3</sub> -HCl) | UHPLC–MS/MS | LOD: 0.21–0.45 $\mu$ g/kg<br>RSD: 3–13.8 %<br>Recovery: 90–110%      | Testosterone: 3.2–16.0 $\mu$ g/kg<br>Progesterone: 1.9–5.4 $\mu$ g/kg<br>Androsterone 4.1 $\mu$ g/kg<br>Pregnenolone: 3.7–8.2 $\mu$ g/kg<br>Cortisone: 2.0–24.8 $\mu$ g/kg<br>Hydrocortisone: 0.73–1.8 $\mu$ g/kg<br>Trenbolone acetate: 2.95 $\mu$ g/kg                                                                                                                  | [27]      |
| Estrone, 17 $\beta$ -estradiol, estriol, 17 $\alpha$ -ethinyl estradiol, dienestrol, diethylstilbestrol and hexestrol                                                                                                                        | Eel, grass carp, goldfish, shrimp                                     | China                                                         | DMI-MSPD                                                         | HPLC–MS/MS  | LOD: 1.6–2.8 $\mu$ g/kg<br>RSD: 2–5%<br>Recovery: 89–103%            | Diethylstilbestrol: 5.2 $\mu$ g/kg                                                                                                                                                                                                                                                                                                                                        | [29]      |
| Estrone, 17 $\beta$ -estradiol, estriol and diethylstilbestrol, 17 $\alpha$ -ethinyl estradiol, dienestrol, hexestrol, 2-methoxyestradiol, estradiol benzoate and estradiol-17-valerate and bisphenol A                                      | Pork and chicken meat                                                 | China                                                         | QuEChERS-MSPE                                                    | UHPLC–MS/MS | LOD: 0.02–3 $\mu$ g/kg<br>RSD: 0.48–15.1%<br>Recovery: 81–115%       | Estrone: 0.09–0.10 $\mu$ g/kg<br>Diethylstilbestrol: 0.55–0.92 $\mu$ g/kg                                                                                                                                                                                                                                                                                                 | [30]      |
| Testosterone, mengestrol, methyltestosterone and others veterinary drugs                                                                                                                                                                     | Pork, beef, mutton, chicken, pork liver, lamb liver and chicken liver | China                                                         | LLE, SPE                                                         | UPLC–MS/MS  | LOD: 0.1–10 $\mu$ g/kg<br>RSD: < 7.8%<br>Recovery: 80–116%           | –                                                                                                                                                                                                                                                                                                                                                                         | [31]      |
| Testosterone, progesterone, diethylstilbestrol and others EDCs                                                                                                                                                                               | Maricultured fish                                                     | Malaysia                                                      | UAE, SPE                                                         | HPLC–MS/MS  | LOD: 0.49–2.08 $\mu$ g/kg<br>RSD: < 30%<br>Recovery: 95–110 %        | Testosterone: 0.57–4.25 $\mu$ g/kg<br>Progesterone: 0.80–9.78 $\mu$ g/kg                                                                                                                                                                                                                                                                                                  | [32]      |
| Estrone, 17 $\beta$ -estradiol, estriol and others EDCs                                                                                                                                                                                      | Chicken meat, fish and pond water                                     | China                                                         | LLE, DLLME, derivatization (BCEC-Cl)                             | HPLC–MS     | LOD: 0.03–0.07 $\mu$ g/L<br>RSD: 3.1–5.4%<br>Recovery: 88–106%       | Estriol: 3.94 $\mu$ g/L                                                                                                                                                                                                                                                                                                                                                   | [33]      |
| Corticosterone, estrone, estriol, medroxyprogesterone, progesterone, 17 $\beta$ -estradiol, 17 $\alpha$ -hydroxyprogesterone, testosterone, and 19-nortestosterone                                                                           | Fish tissue                                                           | China                                                         | DMAE, LLE                                                        | HPLC–MS/MS  | LOD: 0.03–0.15 $\mu$ g/kg<br>RSD: 3.3–5.6%<br>Recovery: 75–95%       | Testosterone: 0.45 $\mu$ g/kg<br>17 $\alpha$ -Estradiol: 0.39–0.44 $\mu$ g/kg<br>19-Nortestosterone: 0.30 $\mu$ g/kg<br>17 $\alpha$ -Hydroxyprogesterone: 0.26 $\mu$ g/kg<br>Corticosterone: 0.57 $\mu$ g/kg                                                                                                                                                              | [34]      |
| Progesterone, testosterone, estrone, 17 $\beta$ -estradiol, 17 $\alpha$ -ethinyl estradiol and others EDCs                                                                                                                                   | Fish (sea catfish, croaker, marine gastropod mollusks)                | Malaysia                                                      | QuEChERS                                                         | HPLC–MS/MS  | LOD: 0.07–3.50 $\mu$ g/kg<br>Recovery: 64–114%                       | 17 $\beta$ -Estradiol: 0.14–0.91 $\mu$ g/kg<br>Estrone: 0.04–0.38 $\mu$ g/kg<br>Progesterone: 0.39–9.57 $\mu$ g/kg<br>Testosterone: 0.16–0.7 $\mu$ g/kg                                                                                                                                                                                                                   | [38]      |
| Hexestrol, diethylstilbestrol, estrone, 17 $\beta$ -estradiol, 17 $\alpha$ -ethinyl estradiol, estriol, testosterone, dihydrotestosterone, androstenedione, progesterone, norethindrone, levonorgestrel and pregnenolone                     | Fish and meat                                                         | Spain, Norway, Italy, Morocco, Greece, Portugal, Germany, USA | LLE, SPE derivatization (BSTFA–1% TMCS)                          | GC–MS       | LOD: 0.0004–0.0150 $\mu$ g/kg<br>RSD: 3.1–6.8 %<br>Recovery: 90–105% | Hexestrol: 0.020 $\mu$ g/kg<br>Estrone: 0.060–0.970 $\mu$ g/kg<br>17 $\beta$ -Estradiol: 0.170–0.550 $\mu$ g/kg<br>Testosterone: 0.030–0.200 $\mu$ g/kg<br>Dihydrotestosterone: 0.026–1.90 $\mu$ g/kg<br>Androstenedione: 0.160–0.320 $\mu$ g/kg<br>Progesterone: 0.0910.780 $\mu$ g/kg<br>Levonorgestrel: 0.030–0.400 $\mu$ g/kg<br>Pregnenolone: 0.380–0.810 $\mu$ g/kg | This work |

<sup>a</sup> AALLME air-assisted liquid–liquid microextraction; ASE accelerated solvent extraction; BCEC-Cl 2-(11H-benzo[a]carbazol-11-yl) ethyl carbonochloridate; BSTFA–1% TMCS *N,O*-Bis(trimethylsilyl)trifluoroacetamide containing 1% trimethylchlorosilane; DLLME dispersive liquid–liquid microextraction; DMAE dynamic microwave-assisted extraction; DMI dummy molecularly imprinted; EDCs endocrine disrupting compounds; FUSLE focused ultrasound solid–liquid extraction; GC–MS gas chromatography–mass spectrometry; HPLC–MS/MS high-performance liquid chromatography–tandem mass spectrometry; LC-MS/MS liquid chromatography–tandem mass spectrometry; LLE liquid–liquid extraction; LOD limit of detection; LOQ limit of quantification; MAE microwave assisted extraction; MSPD matrix solid-phase dispersion; MSPE magnetic solid phase extraction; MSTFA/NH<sub>4</sub>I/DTE *N*-methyl-*N*-(trimethylsilyl)trifluoroacetamide/ammonium iodide/dithioerythritol; NH<sub>2</sub>OCH<sub>3</sub>-HCl *O*-methylhydroxylamine; QuEChERS Quick, Easy, Cheap, Effective, Rugged and Safe; RSD relative standard deviation; SPE solid-phase extraction; UAE ultrasonic assisted extraction; UHPLC–Orbitrap–HRMS ultra-high performance liquid chromatography–Orbitrap–high resolution mass spectrometry; UHPLC–MS/MS ultra-high performance liquid chromatography–tandem mass spectrometry; UPLC–MS/MS ultra-performance liquid chromatography–tandem mass spectrometry

**Table S2.** Variables influencing the sample pretreatment, solid-phase extraction/clean-up process and derivatization of hormones.

| Variable                                                | Optimum range (selected value) |
|---------------------------------------------------------|--------------------------------|
| Sample pretreatment <sup>a</sup>                        |                                |
| Volume of water-acetonitrile mixture 9:1 (v/v) (mL)     | > 8 (10)                       |
| Centrifugation rate (rpm)                               | 3500-5000 (4000 rpm)           |
| Centrifugation time (min)                               | 11-16 (12)                     |
| Centrifugation temperature (°C)                         | 0-10 (4 °C)                    |
| Continuous solid-phase extraction/clean-up <sup>b</sup> |                                |
| Sample pH                                               | 6.5-7.5 (7)                    |
| Amount of Oasis HLB sorbent (mg)                        | 75-85 (80)                     |
| Volume of acetone (eluent) (μL)                         | 550-650 (600)                  |
| Flow rate of sample (mL/min)                            | 4-6 (5)                        |
| Flow rate of air (mL/min)                               | 4-6 (5)                        |
| Breakthrough volume (mL)                                | 1-200 (10)                     |
| Derivatization <sup>c</sup>                             |                                |
| Percentage of TMCS (catalyst) in BSTFA <sup>c</sup>     | 1-5 (1)                        |
| Microwave oven power (W)                                | 180-220 (200)                  |
| Irradiation time (min)                                  | 3.5-4.5 (4)                    |

<sup>a</sup> To 2 g of meat and fish samples.

<sup>b</sup> These variables have been previously optimized [35].

<sup>c</sup> TMCS, trimethylchlorosilane; BSTFA, *N,O*-bis(trimethylsilyl)trifluoroacetamide.

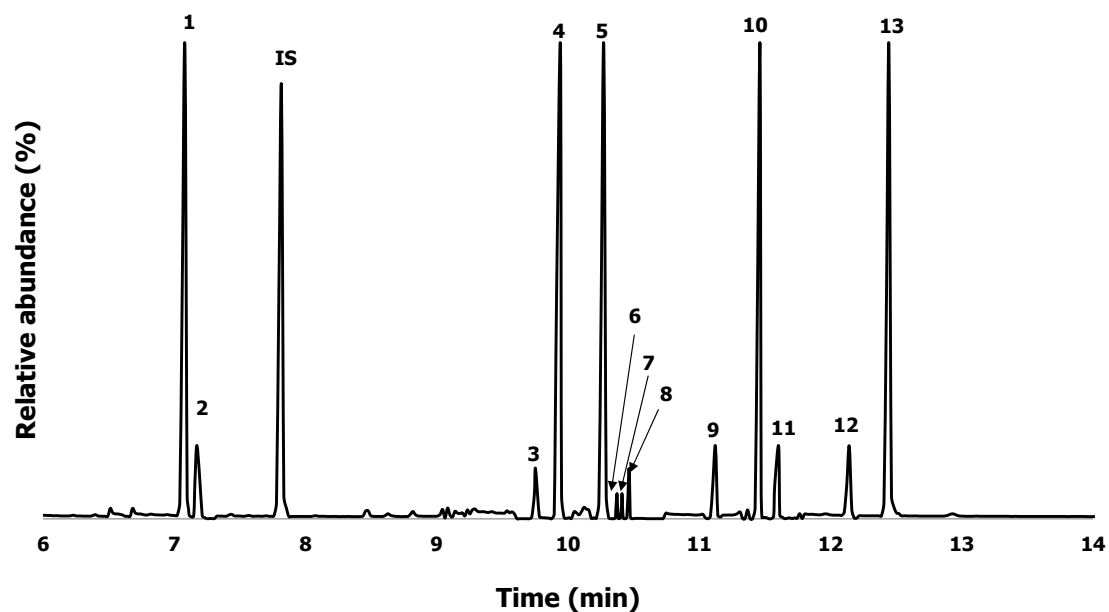

**Figure S1.** Typical chromatogram in the SIM mode for 1 g of chicken breast spiked with all hormones. Concentration: 250 ng/kg [(1) hexestrol, (4) estrone, (5) 17 $\beta$ -estradiol, (10) 17 $\alpha$ -ethinylestradiol, (11) levonorgestrel, (12) progesterone, (13) estriol] and 500 ng/kg [(2) diethylstilbestrol, (3) dihydrotestosterone, (6) androstenedione, (7) norethindrone, (8) testosterone and (9) pregnenolone]. IS: internal standard.
